# Supplementary material for: QEX: target-specific druglikeness filter enhances ligand-based virtual screening
Source: PubMed Central journal article supplement (PMC6394530; doi:10.1007/s11030-018-9842-3), 2018-07-03

## *Supplementary Materials*

### **QEX: Target-specific druglikeness filter enhances ligand-based virtual screening**

Masahiro Mochizuki<sup>1,3</sup>, Shogo D. Suzuki<sup>2,3</sup>, Keisuke Yanagisawa<sup>2,3</sup>,  
Masahito Ohue<sup>2,4</sup> and Yutaka Akiyama<sup>2,3,4,\*</sup>

- 1 IMSBIO, Co., Ltd. Owl tower 6F, 4-21-1, Higashi-ikebukuro, Toshima-ku, Tokyo 170-0013, Japan.
  - 2 School of Computing, Tokyo Institute of Technology. 2-12-1 W8-76, Ookayama, Meguro-ku, Tokyo 152-8550, Japan.
  - 3 Educational Academy of Computational Life Sciences (ACLS), Tokyo Institute of Technology. 2-12-1 W8-93, Ookayama, Meguro-ku, Tokyo 152-8550, Japan.
  - 4 Advanced Computational Drug Discovery Unit (ACDD), Institute of Innovative Research, Tokyo Institute of Technology. 4259 Nagatutacho, Midori-ku, Yokohama, Kanagawa 226-8501, Japan.
- \* Correspondence: [akiyama@c.titech.ac.jp](mailto:akiyama@c.titech.ac.jp); Tel.: +81-3-5734-3645

**Table S1.** Screening scores of Lipinski's rule of five (RO5). The screening scores of RO5 were calculated based on the ranking arranged by the number of rules passed.

| <i>target</i> | <i>AUC</i> | <i>EF (1%)</i> | <i>EF (2%)</i> | <i>EF (5%)</i> | <i>EF (10%)</i> | <i>EF (20%)</i> | <i>EF (50%)</i> |
|---------------|------------|----------------|----------------|----------------|-----------------|-----------------|-----------------|
| Streptokinase | 0.463      | 0.970          | 0.970          | 0.970          | 0.970           | 0.970           | 0.970           |
| PP1           | 0.497      | 0.994          | 0.994          | 0.994          | 0.994           | 0.994           | 0.994           |
| TIM10         | 0.509      | 1.007          | 1.007          | 1.007          | 1.007           | 1.007           | 1.007           |
| SEN8          | 0.516      | 1.020          | 1.020          | 1.020          | 1.020           | 1.020           | 1.020           |
| KCNK9         | 0.445      | 0.916          | 0.916          | 0.916          | 0.916           | 0.916           | 0.916           |

PP1, protein phosphatase 1; TIM10, translocate of the inner mitochondrial membrane subunit 10; SEN8, sentrin-specific protease 8; KCNK9, potassium two-pore domain channel subfamily K member 9; AUC, area under the curve; EF, enrichment factor.

*Note:* The same values were found for all of EF percentages because more than half of the compounds passed all four RO5 rules in all targets, as shown in Table S2.

**Table S2.** Cross table of the number of compounds which passed and failed Lipinski's rule of five (RO5).

**a. Streptokinase**

|          | RO5 pass | RO5 fail |
|----------|----------|----------|
| active   | 1,641    | 579      |
| inactive | 847      | 199      |

**b. PPI**

|          | RO5 pass | RO5 fail |
|----------|----------|----------|
| active   | 735      | 272      |
| inactive | 692      | 245      |

**c. TIM10**

|          | RO5 pass | RO5 fail |
|----------|----------|----------|
| active   | 2,658    | 283      |
| inactive | 1,502    | 193      |

**d. SENP8**

|          | RO5 pass | RO5 fail |
|----------|----------|----------|
| active   | 2,449    | 42       |
| inactive | 3,523    | 182      |

**e. KCNK9**

|          | RO5 pass | RO5 fail |
|----------|----------|----------|
| active   | 1,478    | 619      |
| inactive | 2,306    | 514      |

**Figure S1.** The distributions of the number of rules passed using Lipinski's rule of five (RO5).

**a. Streptokinase**

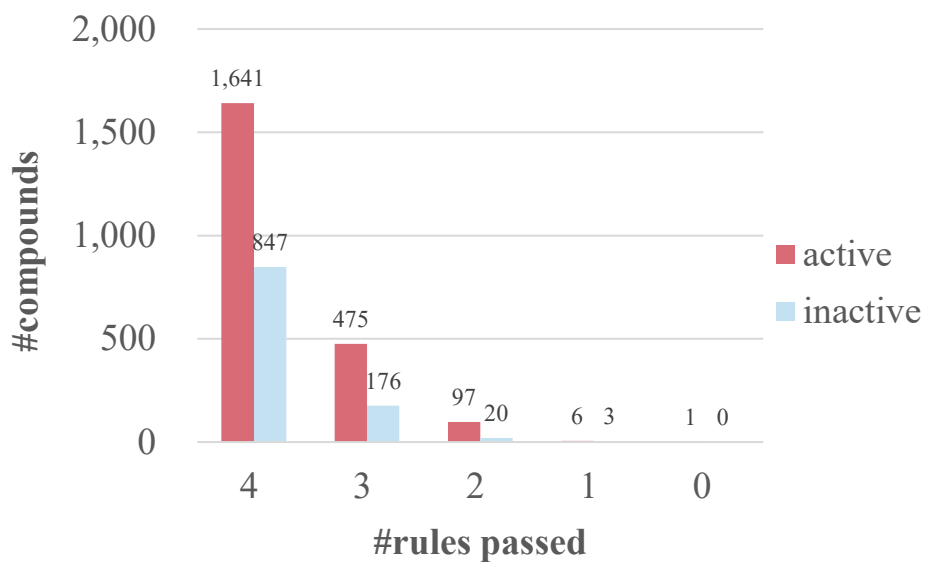

**b. PPI**

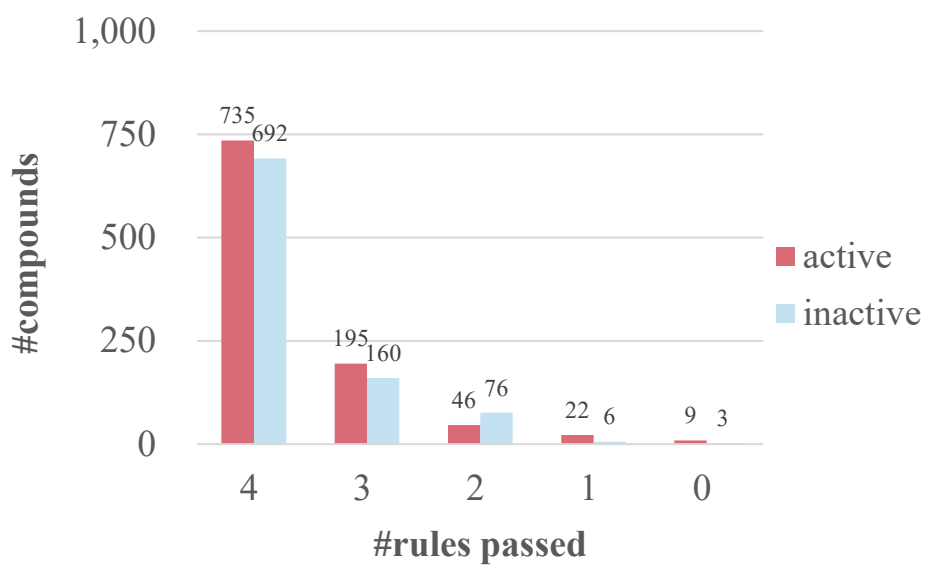

**c. TIM10**

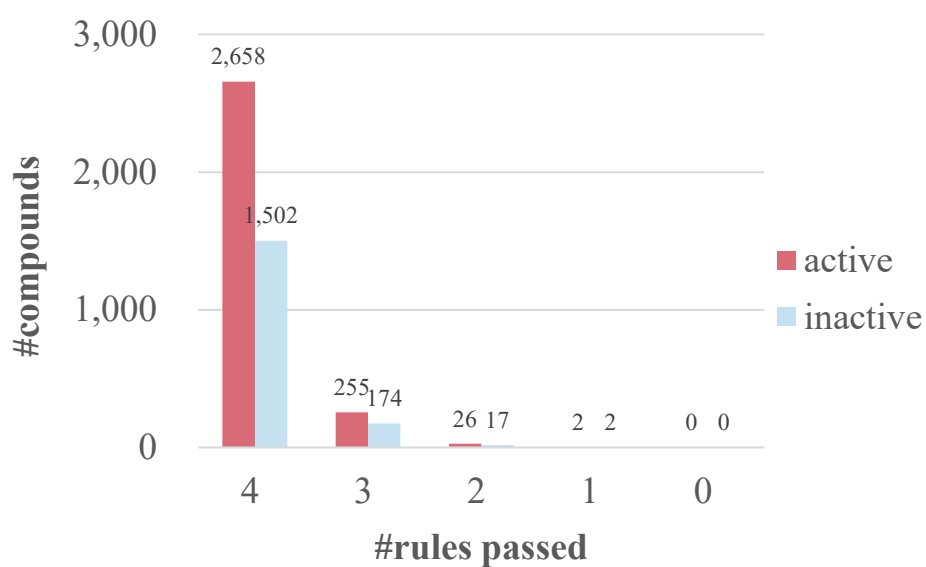

**d. SENP8**

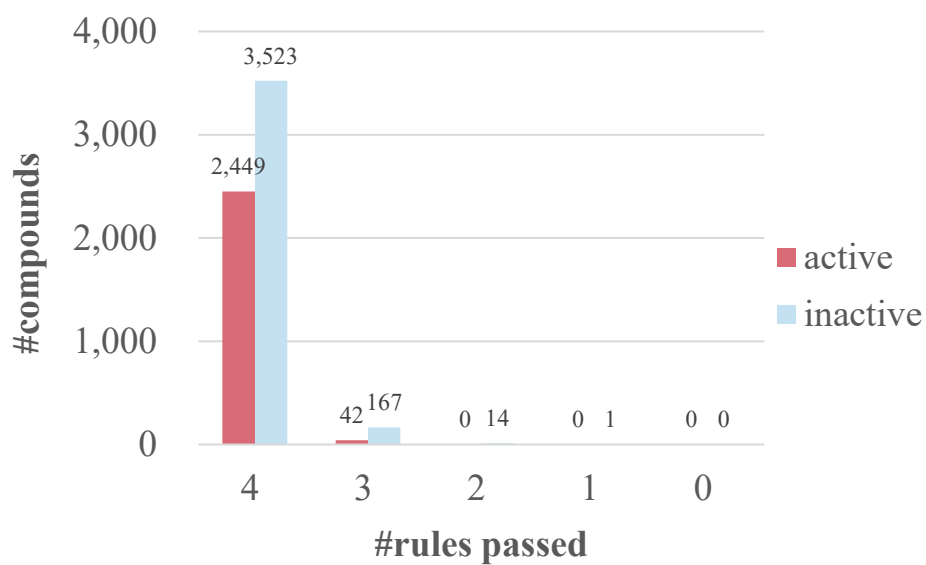

e. KCNK9

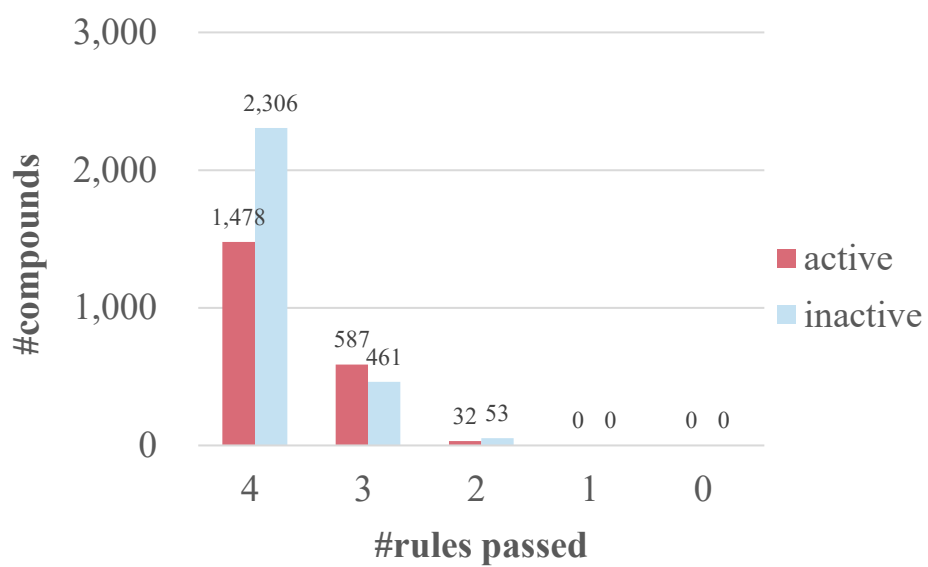

Supplement: 11030_2018_9842_MOESM1_ESM.pdf [file 11030_2018_9842_MOESM1_ESM.pdf]
